# Supplementary material for: Ultra-durable Ni-Ir/MgAl2O4 catalysts for dry reforming of methane enabled by dynamic balance between carbon deposition and elimination
Source: Research Square preprint supplement (doi:10.21203/rs.3.rs-1335282/v1), 2022-02-11
Supplement: Supplementary file 1 [file 2fa59953b8fc0db632c7bbe3.pdf]

## **Supporting Information**

**Ultra-durable Ni-Ir/MgAl<sub>2</sub>O<sub>4</sub> catalysts for dry reforming of methane enabled by dynamic balance between carbon deposition and elimination**

# Table of Contents

|                                                                                                                                                                                                                           |    |
|---------------------------------------------------------------------------------------------------------------------------------------------------------------------------------------------------------------------------|----|
| Catalysts preparation.....                                                                                                                                                                                                | 1  |
| The MgAl <sub>2</sub> O <sub>4</sub> support was synthesized by the hydrothermal method.....                                                                                                                              | 1  |
| The Ni-Ir/MgAl <sub>2</sub> O <sub>4</sub> catalyst was prepared by the impregnation method .....                                                                                                                         | 1  |
| Catalytic evaluation .....                                                                                                                                                                                                | 1  |
| Structural characterization .....                                                                                                                                                                                         | 2  |
| Nitrogen adsorption-desorption .....                                                                                                                                                                                      | 2  |
| X-ray diffraction .....                                                                                                                                                                                                   | 3  |
| X-ray photoelectron spectroscopy .....                                                                                                                                                                                    | 3  |
| Transmission electron microscope.....                                                                                                                                                                                     | 3  |
| Scanning electron microscope .....                                                                                                                                                                                        | 4  |
| Raman spectroscopy .....                                                                                                                                                                                                  | 4  |
| Thermogravimetric Analysis.....                                                                                                                                                                                           | 4  |
| Diffuse reflectance infrared fourier transform spectroscopy .....                                                                                                                                                         | 4  |
| Temperature programmed surface reaction-mass spectrum .....                                                                                                                                                               | 4  |
| CO <sub>2</sub> -temperature programmed desorption.....                                                                                                                                                                   | 5  |
| Computational details. ....                                                                                                                                                                                               | 5  |
| Figures.....                                                                                                                                                                                                              | 7  |
| Fig. S1 N <sub>2</sub> adsorption–desorption isotherms and pore size distribution plots .....                                                                                                                             | 7  |
| Fig. S2 XRD patterns.....                                                                                                                                                                                                 | 8  |
| Fig. S3 Ni and Ir K edge X-ray adsorption fine structure (XAFS) spectroscopy<br>analysis.....                                                                                                                             | 9  |
| Fig. S4 HRTEM images for fresh catalysts .....                                                                                                                                                                            | 10 |
| Fig. S5 TEM-mapping of the Ni <sub>3</sub> Ir <sub>1</sub> /MgAl <sub>2</sub> O <sub>4</sub> catalyst .....                                                                                                               | 11 |
| Fig. S6 CO <sub>2</sub> conversion and H <sub>2</sub> /CO ratio for DRM.....                                                                                                                                              | 12 |
| Fig. S7 CH <sub>4</sub> conversion and H <sub>2</sub> /CO ratio for DRM from 600 to 800 °C.....                                                                                                                           | 13 |
| Fig. S8 HRTEM images for spent catalysts .....                                                                                                                                                                            | 14 |
| Fig. S9 The in-situ DRIFTS spectra of MgAl <sub>2</sub> O <sub>4</sub> after the introduction of CO <sub>2</sub> and<br>adsorption capacity of CO <sub>2</sub> on MgAl <sub>2</sub> O <sub>4</sub> from 650 to 50 °C..... | 15 |

|                                                                                                                                                                                                 |    |
|-------------------------------------------------------------------------------------------------------------------------------------------------------------------------------------------------|----|
| Fig. S10 In-situ DRIFTS spectra after introduction of CO <sub>2</sub> for catalysts.....                                                                                                        | 16 |
| Fig. S11 In-situ DRIFTS spectra after the reintroduction of CO <sub>2</sub> in the third stage of testing for Ir/MgAl <sub>2</sub> O <sub>4</sub> with prolonged CH <sub>4</sub> exposure ..... | 17 |
| Fig. S12 In-situ DRIFTS spectra after introduction of CH <sub>4</sub> in the second stage and introduction of CO <sub>2</sub> in third stage for Ir/Al <sub>2</sub> O <sub>3</sub> .....        | 18 |
| Fig. S13 Temperature programmed desorption of CO <sub>2</sub> (CO <sub>2</sub> -TPD) for catalysts                                                                                              | 19 |
| Fig. S14 The mass spectra of TPSR for catalysts .....                                                                                                                                           | 20 |
| Fig. S15 The mass spectra for CH <sub>4</sub> , CO <sub>2</sub> , CO, H <sub>2</sub> , and H <sub>2</sub> O during TPSR with CH <sub>4</sub> for catalysts .....                                | 21 |
| Fig. S16 The Raman spectra for catalyst after TPSR with CH <sub>4</sub> .....                                                                                                                   | 22 |
| Fig. S17 DFT-optimized structures involved in CO <sub>2</sub> dissociation on M <sub>8</sub> /MgAl <sub>2</sub> O <sub>4</sub> catalysts.....                                                   | 23 |
| Fig. S18 Conversion of CH <sub>4</sub> and CO <sub>2</sub> over Ni-Ir/MgAl <sub>2</sub> O <sub>4</sub> catalyst with different Ir contents for the 100-hour DRM test.....                       | 24 |
| Fig. S19 TGA spectra of the spent Ni-Ir/MgAl <sub>2</sub> O <sub>4</sub> catalysts with different Ir contents .....                                                                             | 25 |
| Tables .....                                                                                                                                                                                    | 26 |
| Table S1. XAFS data fitting for the Ni <sub>3</sub> Ir <sub>1</sub> /MgAl <sub>2</sub> O <sub>4</sub> catalyst. ....                                                                            | 26 |
| Table S2. The comparison of the performance of dry reforming of methane with Ni-based bimetallic catalysts. ....                                                                                | 27 |
| Supplementary References.....                                                                                                                                                                   | 28 |

1

## 2 **Catalyst preparation**

3 **The MgAl<sub>2</sub>O<sub>4</sub> support was synthesized by the hydrothermal method** [1]. The  
4 specific steps are as follows: 18.0 mmol aluminum isopropoxide and 9.0 mmol  
5 Mg(NO<sub>3</sub>)<sub>2</sub>·6H<sub>2</sub>O were added to 55 mL of absolute ethanol. After stirring for 30 min,  
6 the mixture was transferred into a 200 mL polytetrafluoroethylene-lined stainless steel  
7 tubular reactor. After reacting at 150 °C for 12 hours, the liquid was removed by rotary  
8 evaporation, and the powder obtained dried in a vacuum drying oven at 60 °C overnight.  
9 The powder calcinated in a muffle furnace at 800 °C for 12 hours at a heating rate of 2  
10 °C·min<sup>-1</sup>. The white powdery solid was the MgAl<sub>2</sub>O<sub>4</sub> spinel.

11 **The Ni-Ir/MgAl<sub>2</sub>O<sub>4</sub> catalyst was prepared by the impregnation method.** The  
12 Ni<sub>3</sub>Ir<sub>x</sub>/MgAl<sub>2</sub>O<sub>4</sub> catalysts with a Ni loading of 3 wt% (x/3 represents the molar ratio  
13 relative to Ir/Ni) were prepared by the co-impregnation method. Ni(NO<sub>3</sub>)<sub>2</sub>·6H<sub>2</sub>O and  
14 IrCl<sub>3</sub>·xH<sub>2</sub>O were dissolved in deionized water. The MgAl<sub>2</sub>O<sub>4</sub> spinel was added into the  
15 mixed solution of precursors under stirring for 12 hours at room temperature, and then  
16 rotate to remove the water. The powder obtained dried in a vacuum drying oven at 60  
17 °C overnight, and then calcinated in a muffle furnace at 550 °C for 4 hours at a heating  
18 rate of 2 °C·min<sup>-1</sup>. The content of Ir in Ir/MgAl<sub>2</sub>O<sub>4</sub> was 3wt%.

19

## 20 **Catalytic evaluation**

21 The performance evaluation for methane dry reforming was performed in a four-  
22 channel fixed-bed flow reactor, which used four identical quartz reaction tubes. The  
23 catalyst powder was pressed into tablets, and particles of 40-60 mesh were screened out  
24 by crushing. 60 mg of catalyst particles were weighed, mixed with 300 mg of 40-60  
25 mesh quartz sand, and then put into a quartz reaction tube. The total flow of H<sub>2</sub>, N<sub>2</sub>,  
26 CH<sub>4</sub>, and CO<sub>2</sub> was controlled by the corresponding mass flow meter (MFC). The flow  
27 distribution system was used to divide the gas flow into four evenly, which were  
28 introduced into the four reaction tubes. A two-stage electric heating furnace was used

29 to heat the reaction tube. The catalyst was located in the constant temperature zone of  
30 the heating furnace. The exhaust gas passed through a cold trap to condense the water  
31 vapor. The selected exhaust gas flowed through the quantitative ring of the electric six-  
32 way valve, and then was discharged to the outdoor high altitude. The composition and  
33 content of the exhaust gas were analyzed by a Shimadzu GC-2014 chromatographic  
34 automatic sample injection analysis. A 60 cm long TDX-01 packed column with an  
35 inner diameter of 2 mm was used to separate the components, and the TCD was used  
36 as a detector. The detection time was 10 minutes, and the four-way exhaust gas was  
37 analyzed in turn.

38 Before the reaction, the catalyst was reduced with  $30 \text{ mL}\cdot\text{min}^{-1}$  high-purity hydrogen  
39 at  $650 \text{ }^\circ\text{C}$  for 2 hours, and the heating rate was  $10 \text{ }^\circ\text{C}\cdot\text{min}^{-1}$ . After the reduction was  
40 complete, purge with nitrogen for 10 minutes to desorb the hydrogen adsorbed on the  
41 catalyst surface. Then turn off  $\text{N}_2$ , and pass in  $\text{CH}_4$  and  $\text{CO}_2$ . The flow rate of methane  
42 was  $F_{\text{CH}_4} = 33.3 \text{ mL}\cdot\text{min}^{-1}$ , and the flow rate of carbon dioxide was  $F_{\text{CO}_2} = 33.3$   
43  $\text{mL}\cdot\text{min}^{-1}$ . After the reactor was cooled to room temperature, the catalyst was taken out  
44 and separated from quartz sand for subsequent analysis and characterization.

45 The conversion of  $\text{CH}_4$ ,  $\text{CO}_2$ , and  $\text{H}_2/\text{CO}$  were calculated by the following formula:

46 The conversion of  $\text{CH}_4$ :  $C_{\text{CH}_4} = \frac{F_{\text{CH}_4,\text{in}} - F_{\text{CH}_4,\text{out}}}{F_{\text{CH}_4,\text{in}}} \times 100\%$  (1)

47 The conversion of  $\text{CO}_2$ :  $C_{\text{CO}_2} = \frac{F_{\text{CO}_2,\text{in}} - F_{\text{CO}_2,\text{out}}}{F_{\text{CO}_2,\text{in}}} \times 100\%$  (2)

48 The  $\text{H}_2/\text{CO}$ :  $\frac{n_{\text{H}_2}}{n_{\text{CO}}} = \frac{F_{\text{H}_2,\text{out}}}{F_{\text{CO}_2,\text{out}}}$  (3)

49 F: Gas flow ( $\text{mL}\cdot\text{min}^{-1}$ ),

50 In: Reactor inlet,

51 Out: Reactor outlet.

52

## 53 **Structural characterization**

54 ***Nitrogen adsorption-desorption.*** Quantachrome Autosorb-3B adsorption instrument  
55 was used for nitrogen adsorption-desorption test. The test and analysis methods were  
56 as follows: the sample was vacuum-activated at  $300 \text{ }^\circ\text{C}$  for 3 hours, and then nitrogen

57 was adsorbed and desorbed in a liquid nitrogen bath (77 K) to obtain an isotherm. The  
58 Brunauer-Emmet-Teller (BET) method was used to calculate the specific surface area:

$$59 \quad \frac{P}{V(P_0-P)} = \frac{1}{V_m C} + \frac{(C-1)P}{W_m C P_0} \quad (4)$$

$$60 \quad S_g = 4.353 V_m \text{ m}^2/\text{g}$$

61 The Barrett-Jovner-Halenda (BJH) method was used to calculate the pore size  
62 distribution of the adsorption-desorption isotherm desorption branch.

63 **X-ray diffraction.** Japan Rigaku Ultima X-ray diffractometer was used for phase  
64 analysis of catalyst samples. The radiation source adopted Cu K $\alpha$  line with wavelength  
65  $\lambda = 0.15405$  nm, and used Goebel mirror to converge the divergent X beam into parallel  
66 light. The tube voltage was 35 kV, the tube current was 25 mA, the scanning rate was  
67 10 °/min, and the scanning step length was 0.02 °. According to the Bragg formula:

$$68 \quad 2d_{(hkl)} \sin \theta_{(hkl)} = \lambda \quad (5)$$

69 From the position  $2\theta_{(hkl)}$  of the diffraction peak (hkl) on the XRD pattern, the  
70 corresponding interplanar distance  $d_{(hkl)}$  could be calculated, and then the unit cell  
71 parameters of the sample could be obtained according to  $d_{(hkl)}$ .

72 The half-width of the XRD diffraction of the sample and the grain size of the sample  
73 accorded with the Scherrer formula:

$$74 \quad D = K\lambda/\beta \cos \theta \quad (6)$$

75 Among them, D is the grain size,  $\lambda$  is the wavelength of incident X-ray, and  $\lambda = 0.15405$   
76 nm in this paper. K is the grain shape factor, taking  $K = 0.89$ .  $\beta$  is the half-width of the  
77 diffraction peak. In order to eliminate the influence of instrument factors on the width  
78 of the diffraction peak, the instrument is calibrated with quartz as the reference material:

$$79 \quad \beta_t = \sqrt{\beta_o^2 - \beta_{Quartz}^2} \quad (7)$$

80  $\beta_o$ : measured half-width,

81  $\beta_{Quartz}$ : half-width of the quartz sand near the diffraction peak of the sample.

82 **X-ray photoelectron spectroscopy.** A Thermo Scientific K-Alpha X-ray photoelectron  
83 spectrometer was used to collect the X-ray photoelectron spectroscopy data of the  
84 catalyst. The binding energy of C1s (284.8 eV) was used for correction.

85 **Transmission electron microscope.** The US FEI-Tecnai G2F30 field emission electron  
86 microscope was used to observe the catalyst microstructure and sample image

87 collection. The Oxford X-Max T80 energy spectrometer configured on the electron  
88 microscope was used for surface scan and line scan data acquisition.

89 **Scanning electron microscope.** The Hitachi S-4800 scanning electron microscope was  
90 used to observe the morphology of the catalyst and to collect the image of the sample.

91 **Raman spectroscopy.** It was performed by DXR2 Raman Spectrometer with 532 nm  
92 laser. It was used to analyze the coking of samples.

93 **Thermogravimetric Analysis.** A METTLER TOLEDO thermogravimetric analyzer  
94 was used to characterize the carbon deposits of the spent catalyst. The test conditions:  
95 about 5 mg of the spent catalyst powder, at an air flow rate of 50 mL/min, rising from  
96 25 °C to 800 °C at a heating rate of 10 °C·min<sup>-1</sup>.

97 **Diffuse reflectance infrared fourier transform spectroscopy.** Operando DRIFTS  
98 measurements were performed by BRUKER TENSOR 27 with a Harrick cell and an  
99 MCT detector. The resolution of infrared spectrum collection was 4 cm<sup>-1</sup>, and the  
100 number of collections was 64 times. Before the experiment, the sample was pre-treated  
101 in the in-situ cell in an H<sub>2</sub> atmosphere at 650 °C for 1 hour, and then switched to an Ar  
102 atmosphere for 30 minutes to eliminate surface adsorbed substances. The background  
103 spectrum of the sample was collected under Ar atmosphere. In the first stage, pass CO<sub>2</sub>  
104 (50 mL·min<sup>-1</sup>) into the in-situ cell to react for 15 minutes and collect the sample  
105 spectrum (30 s/spectrum), and then purge by Ar until there was no gaseous CO<sub>2</sub> in the  
106 collected sample spectrum. In the second stage, CH<sub>4</sub> (50 mL·min<sup>-1</sup>) was passed into the  
107 in-situ cell for 15 minutes to react and the spectrum of the sample was collected  
108 (30s/spectrum), and then purge by Ar until there was no gaseous CO<sub>2</sub> in the collected  
109 sample spectrum. In the third stage, CO<sub>2</sub> (50 mL·min<sup>-1</sup>) was introduced into the in-situ  
110 tank to react for 15 minutes and the sample spectrum was collected (30 s/spectrum).

111 **Temperature programmed surface reaction-mass spectrum.** It was carried out on the  
112 Tianjin Xianquan TP5080 multi-purpose adsorption apparatus with a thermal  
113 conductivity detector (TCD). The test procedure for CH<sub>4</sub> dissociation: 30 mg of a  
114 sample with a particle size of 20-40 mesh, pretreat it at 650 °C for 1 hour under 30  
115 mL·min<sup>-1</sup> H<sub>2</sub> purge. Then cool down to room temperature (approximately 25 °C), and  
116 switch the H<sub>2</sub> to 5 mL·min<sup>-1</sup> CH<sub>4</sub> to record mass baseline. After the baseline is stable,

117 the temperature is increased to 650 °C at a heating rate of 10 °C·min<sup>-1</sup> and then kept for  
118 1 h, while the mass spectrum was recorded at the same time. Then switch CH<sub>4</sub> to 30  
119 mL·min<sup>-1</sup> N<sub>2</sub> and cool down to room temperature (about 25 °C). Switch the N<sub>2</sub> to 5  
120 mL·min<sup>-1</sup> CO<sub>2</sub> and start to record the mass spectrum baseline. After the baseline is stable,  
121 the temperature is increased to 950 °C at a heating rate of 10 °C·min<sup>-1</sup>, and the mass  
122 spectrum is recorded.

123 ***CO<sub>2</sub>-temperature programmed desorption.*** It was carried out on the Tianjin Xianquan  
124 TP5080 multi-purpose adsorption apparatus with a thermal conductivity detector  
125 (TCD). The test procedure: 30 mg of a sample with a particle size of 20-40 mesh,  
126 pretreat it at 300 °C for 1 hour under 30 mL·min<sup>-1</sup> He purge. Then cool down to room  
127 temperature (approximately 25 °C), and switch the He to 30 mL·min<sup>-1</sup> CO<sub>2</sub> for 1h. After  
128 that, switch the CO<sub>2</sub> to 30 mL·min<sup>-1</sup> He and start recording the baseline. After the  
129 baseline is stable, stop recording. Then increase the temperature to 900 °C at a heating  
130 rate of 10 °C·min<sup>-1</sup>, and record the reduction curve at the same time.

131

### 132 **Computational details.**

133 Spin-polarized periodic density functional theory (DFT) calculations were  
134 implemented using the Vienna Ab Initio Simulation Package (VASP) software<sup>[2-5]</sup>. The  
135 generalized gradient approximation (GGA) of Perdew-Burke-Ernzerh (PBE) exchange-  
136 correlation functional<sup>[6]</sup>, using projector-augmented wave (PAW) pseudopotentials<sup>[7]</sup>,  
137 was employed here. Grimme's DFT-D3BJ approach<sup>[8]</sup> was also involved to describe  
138 van der Waals interactions between the molecules and the catalyst surfaces. The valence  
139 electrons were described by plane wave basis sets with a plane-wave cut-off energy of  
140 400 eV, whereas the energy and residual forces during the optimization were converged  
141 to 10<sup>-5</sup> eV and 0.05 eV/Å, respectively. The spinel MgAl<sub>2</sub>O<sub>4</sub> unit cell was calculated  
142 through a 6×6×6 k-point grid, and a p(2×2) superstructure was employed for simulating  
143 the MgAl<sub>2</sub>O<sub>4</sub> (100) surface with eight layers in which the bottom five layers of atoms  
144 were fully fixed and the other atoms were allowed to relax during the optimization. The  
145 vacuum region was set to 20 Å for the slab model. The Brillouin zone sampling was

146 conducted with the Gamma point. The climbing nudged elastic band (CINEB) method  
147 [9-10] and the dimer method [11] were applied for optimizing transition states (TS).

148 Adsorption energies of CO<sub>2</sub>, CO and O-atom were calculated by the following formula:

$$149 \quad \Delta E_{\text{ads,CO}_2} = E_{\text{catalyst+CO}_2} - E_{\text{catalyst}} - E_{\text{CO}_2} \quad (8)$$

$$150 \quad \Delta E_{\text{ads,CO}} = E_{\text{catalyst+CO}} - E_{\text{catalyst}} - E_{\text{CO}} \quad (9)$$

$$151 \quad \Delta E_{\text{ads,O}} = E_{\text{O}_2} - E_{\text{catalyst}} - 0.5 E_{\text{O}_2} \quad (10)$$

152 where  $E_{\text{ads,CO}_2}$ ,  $E_{\text{ads,CO}}$ ,  $E_{\text{ads,O}}$  are the total energies for the adsorbed CO<sub>2</sub>, CO and O-  
153 atom on the catalyst, respectively,  $E_{\text{catalyst}}$  is the energy of the unadsorbed catalyst, and  
154  $E_{\text{CO}_2}$ ,  $E_{\text{CO}}$  and  $E_{\text{O}_2}$  are the energies of CO<sub>2</sub>, CO and O<sub>2</sub>, respectively.

155 **Figures**

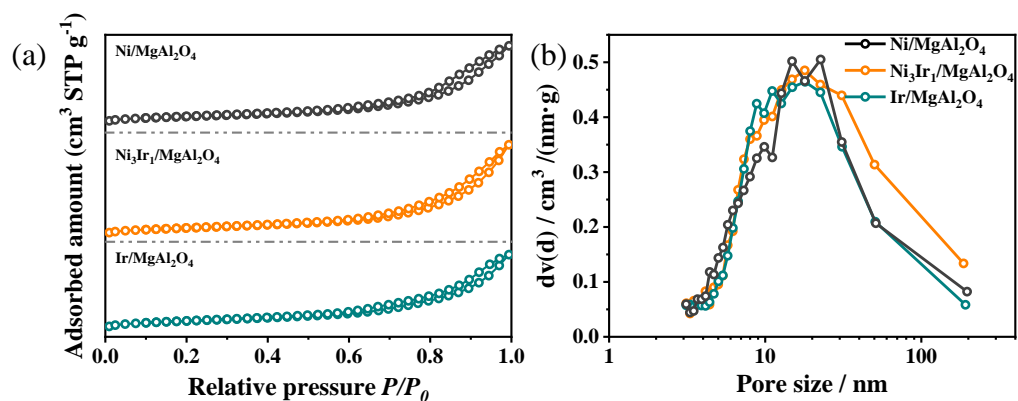

156

157 Fig. S1 (a) N<sub>2</sub> adsorption–desorption isotherms and (b) pore size distribution plots for  
158 Ni/MgAl<sub>2</sub>O<sub>4</sub>, Ni<sub>3</sub>Ir<sub>1</sub>/MgAl<sub>2</sub>O<sub>4</sub>, and Ir/MgAl<sub>2</sub>O<sub>4</sub>.

159

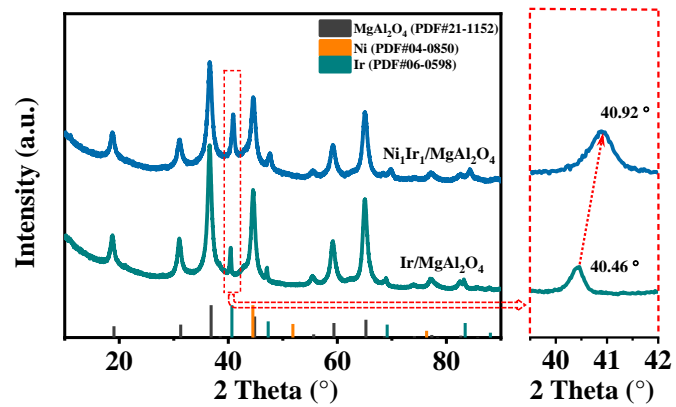

160

161 Fig. S2 XRD patterns of  $\text{Ni}_1\text{Ir}_1/\text{MgAl}_2\text{O}_4$ , and  $\text{Ir}/\text{MgAl}_2\text{O}_4$ .

162

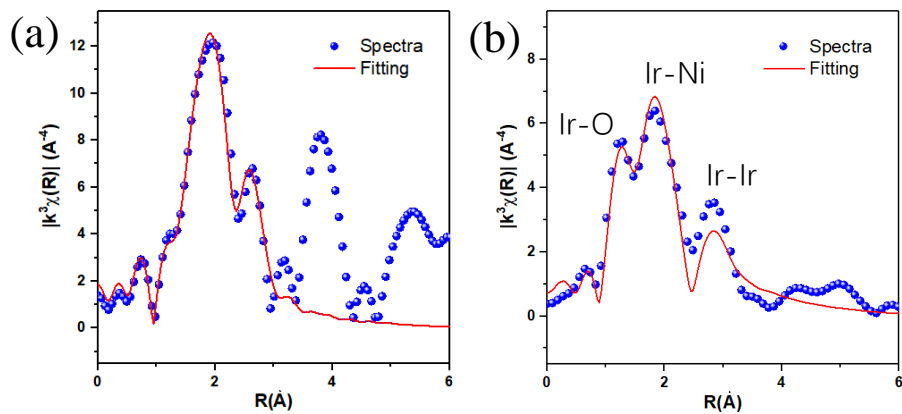

163

164 Fig. S3 (a) Ni and (b) Ir K edge X-ray adsorption fine structure (XAFS) spectroscopy  
 165 analysis of the Ni<sub>3</sub>Ir<sub>1</sub>/MgAl<sub>2</sub>O<sub>4</sub> catalyst.

166

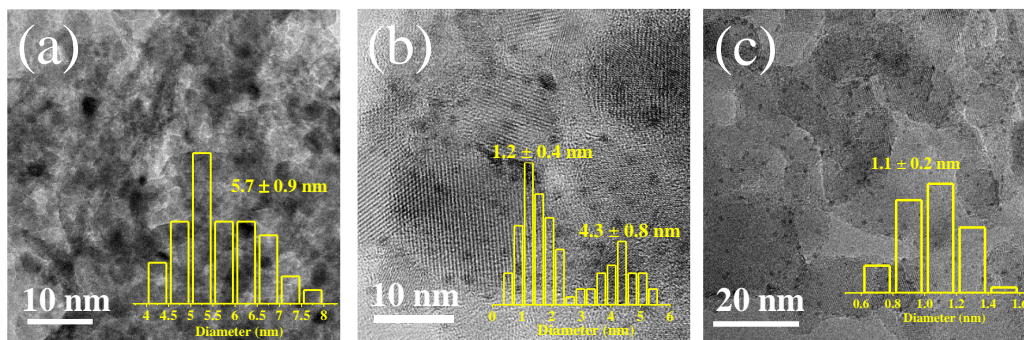

167

168

Fig. S4 HRTEM images for fresh catalysts of (a) Ni/MgAl<sub>2</sub>O<sub>4</sub>, (b) Ni<sub>3</sub>Ir<sub>1</sub>/MgAl<sub>2</sub>O<sub>4</sub> and

169

(c) Ir/MgAl<sub>2</sub>O<sub>4</sub>.

170

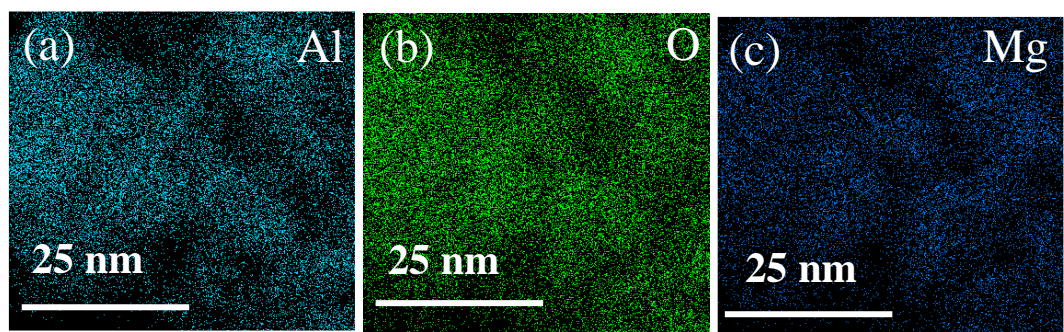

171

172 Fig. S5 TEM-mapping of the  $\text{Ni}_3\text{Ir}_1/\text{MgAl}_2\text{O}_4$  catalyst; (a) Al, (b) O, and (c) Mg.

173

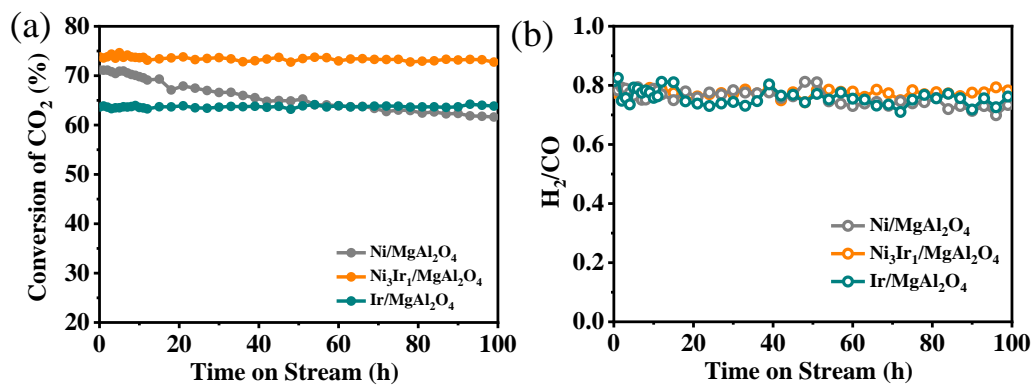

174

175 Fig. S6 (a) CO<sub>2</sub> conversion and (b) H<sub>2</sub>/CO ratio for Ni/MgAl<sub>2</sub>O<sub>4</sub>, Ni<sub>3</sub>Ir<sub>1</sub>/MgAl<sub>2</sub>O<sub>4</sub>, and

176 Ir/MgAl<sub>2</sub>O<sub>4</sub>. Reaction conditions: 650 °C, CH<sub>4</sub>/CO<sub>2</sub> = 1/1, GHSV = 40,000 mL·g<sup>-1</sup>·h<sup>-1</sup>,

177 and 1 atm.

178

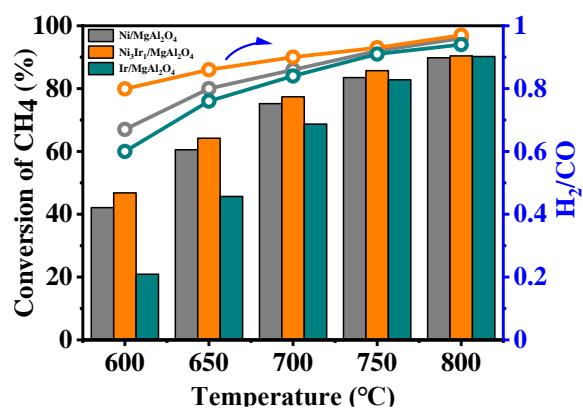

179

180 Fig. S7 CH<sub>4</sub> conversion and H<sub>2</sub>/CO ratio for Ni/MgAl<sub>2</sub>O<sub>4</sub>, Ni<sub>3</sub>Ir<sub>1</sub>/MgAl<sub>2</sub>O<sub>4</sub>, and  
 181 Ir/MgAl<sub>2</sub>O<sub>4</sub> from 600 to 800 °C.

182

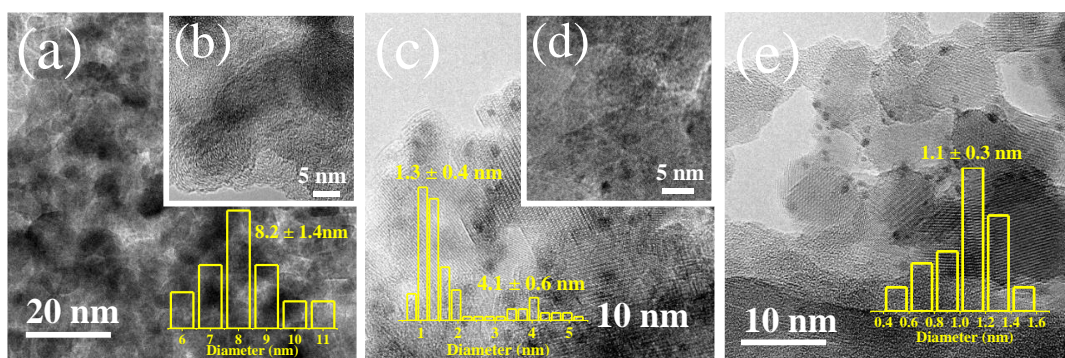

183

184 Fig. S8 HRTEM images for spent catalysts of (a-b) Ni/MgAl<sub>2</sub>O<sub>4</sub>, (c-d) Ni<sub>3</sub>Ir<sub>1</sub>/MgAl<sub>2</sub>O<sub>4</sub>  
 185 and (e) Ir/MgAl<sub>2</sub>O<sub>4</sub>.

186

187

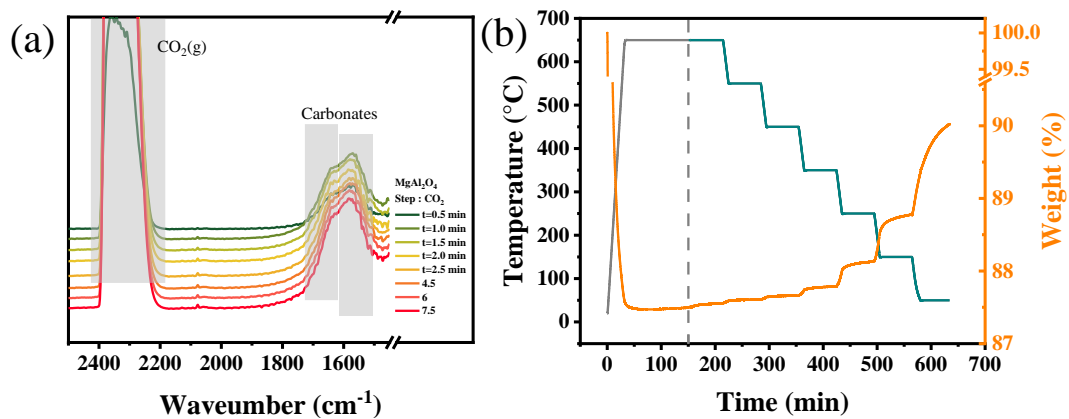

188  
189  
190  
191

Fig. S9 (a) The in-situ DRIFTS spectra of  $\text{MgAl}_2\text{O}_4$  after the introduction of  $\text{CO}_2$ , (b) adsorption capacity of  $\text{CO}_2$  on  $\text{MgAl}_2\text{O}_4$  from 650 to 50 °C.

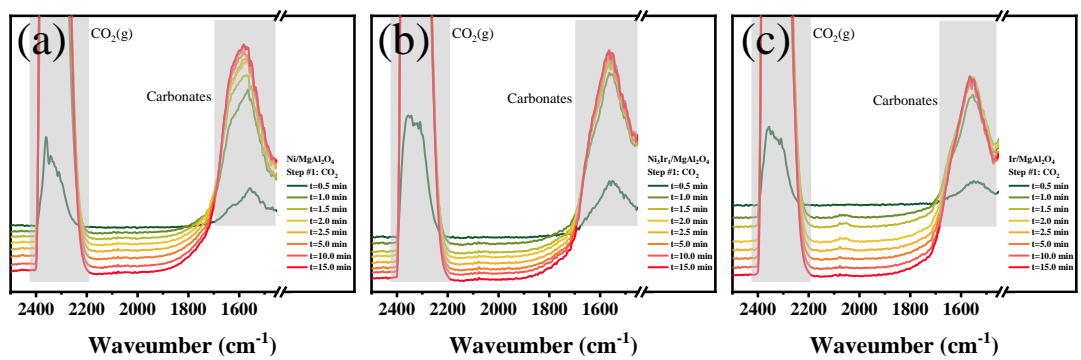

192

193 Fig. S10 In-situ DRIFTS spectra after introduction of CO<sub>2</sub> for (a) Ni/MgAl<sub>2</sub>O<sub>4</sub>, (b)

194 Ni<sub>3</sub>Ir<sub>1</sub>/MgAl<sub>2</sub>O<sub>4</sub>, and (c) Ir/MgAl<sub>2</sub>O<sub>4</sub>.

195

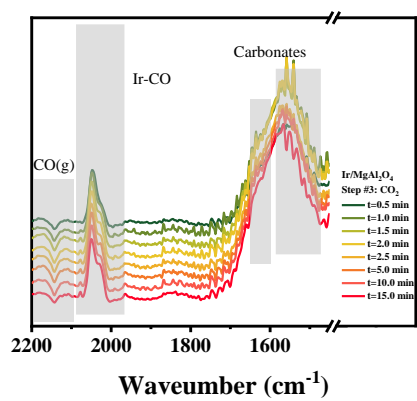

196

197 Fig. S11 In-situ DRIFTS spectra after the reintroduction of CO<sub>2</sub> in the third stage of  
198 testing for Ir/MgAl<sub>2</sub>O<sub>4</sub> with prolonged CH<sub>4</sub> exposure.

199

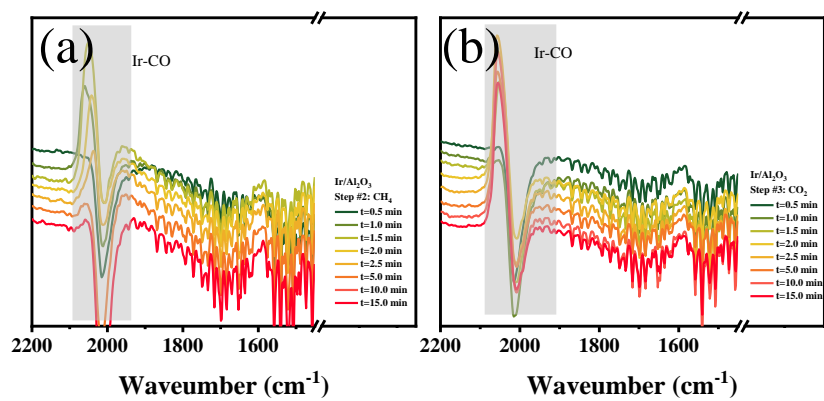

200

201 Fig. S12 In-situ DRIFTS spectra after (a) introduction of CH<sub>4</sub> in the second stage, and  
 202 (b) introduction of CO<sub>2</sub> in third stage for Ir/Al<sub>2</sub>O<sub>3</sub>.

203

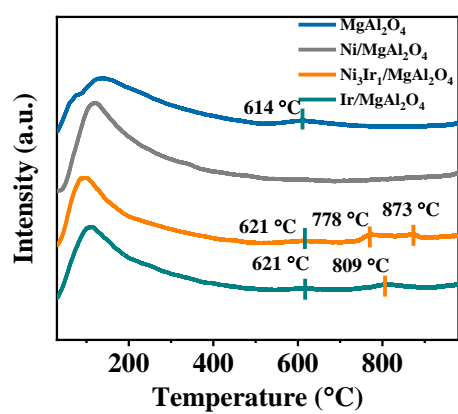

204

205 Fig. S13 Temperature programmed desorption of CO<sub>2</sub> (CO<sub>2</sub>-TPD) for Ni/MgAl<sub>2</sub>O<sub>4</sub>,

206 Ni<sub>3</sub>Ir<sub>1</sub>/MgAl<sub>2</sub>O<sub>4</sub>, Ir/MgAl<sub>2</sub>O<sub>4</sub>, and MgAl<sub>2</sub>O<sub>4</sub>.

207

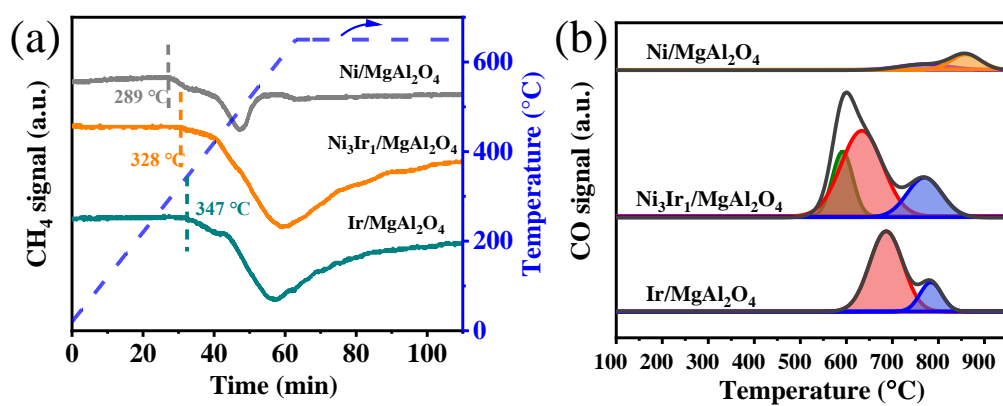

208

209 Fig. S14 The mass spectra of TPSR for Ni/MgAl<sub>2</sub>O<sub>4</sub>, Ni<sub>3</sub>Ir<sub>1</sub>/MgAl<sub>2</sub>O<sub>4</sub>, and Ir/MgAl<sub>2</sub>O<sub>4</sub>

210 (a) introduction of CH<sub>4</sub>, (b) introduction of CO<sub>2</sub> after CH<sub>4</sub>.

211

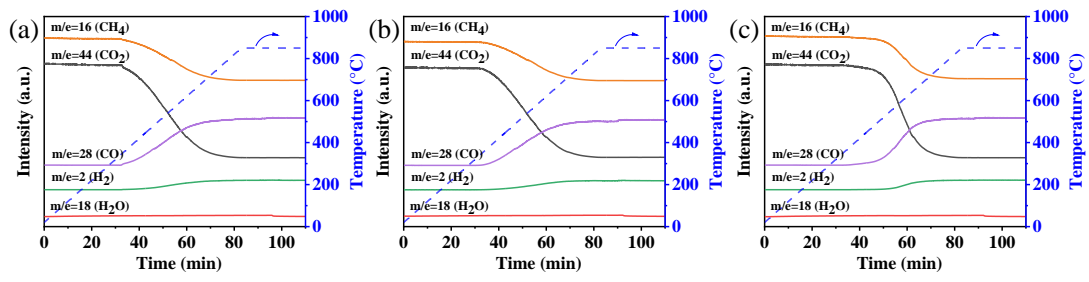

212

213 Fig. S15 The mass spectra for CH<sub>4</sub>, CO<sub>2</sub>, CO, H<sub>2</sub>, and H<sub>2</sub>O during TPSR with CH<sub>4</sub> for  
 214 (a) Ni/MgAl<sub>2</sub>O<sub>4</sub>, (b) Ni<sub>3</sub>Ir<sub>1</sub>/MgAl<sub>2</sub>O<sub>4</sub>, and (c) Ir/MgAl<sub>2</sub>O<sub>4</sub>.

215

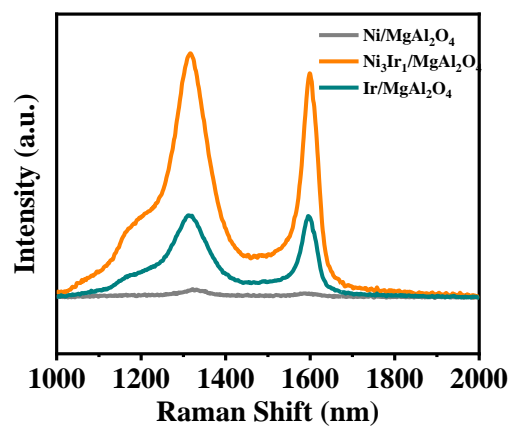

216

217 Fig. S16 The Raman spectra of Ni/MgAl<sub>2</sub>O<sub>4</sub>, Ni<sub>3</sub>Ir<sub>1</sub>/MgAl<sub>2</sub>O<sub>4</sub>, and Ir/MgAl<sub>2</sub>O<sub>4</sub> after  
218 TPSR with CH<sub>4</sub>.

219

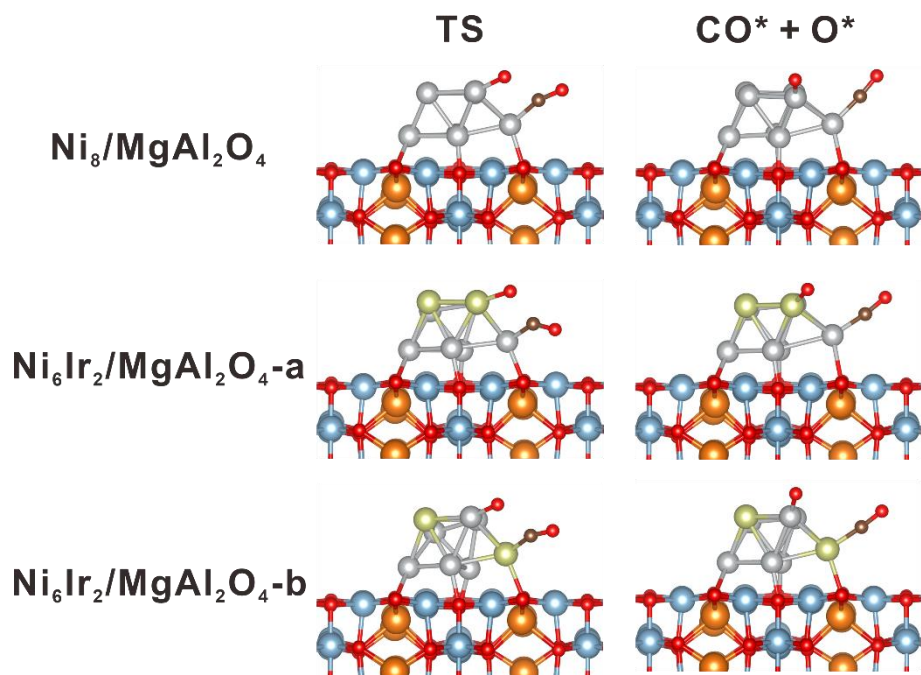

220

221 Fig. S17 DFT-optimized structures involved in CO<sub>2</sub> dissociation on M<sub>8</sub>/MgAl<sub>2</sub>O<sub>4</sub>  
 222 catalysts.

223

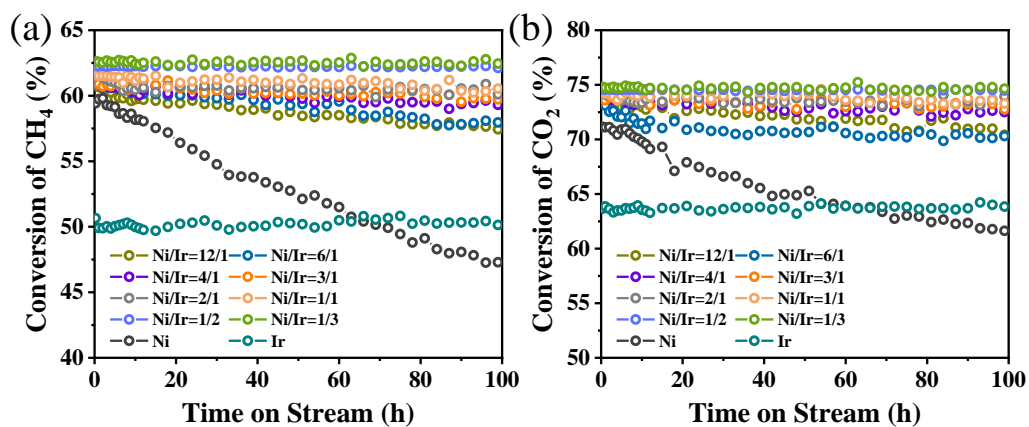

224

225 Fig. S18 Conversion of (a) CH<sub>4</sub> and (b) CO<sub>2</sub> over Ni-Ir/MgAl<sub>2</sub>O<sub>4</sub> catalyst with different  
 226 Ir contents for the 100-hour DRM test. Reaction conditions: 650 °C, CH<sub>4</sub>/CO<sub>2</sub> = 1/1,  
 227 GHSV = 40,000 mL·g<sup>-1</sup>·h<sup>-1</sup>, and 1 atm.

228

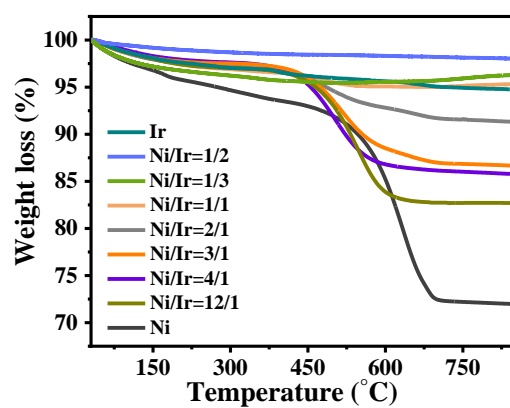

229

230 Fig. S19 TGA spectra of the spent Ni-Ir/MgAl<sub>2</sub>O<sub>4</sub> catalysts with different Ir contents.

231

232

233

234 **Tables**235 Table S1. XAFS data fitting for the Ni<sub>3</sub>Ir<sub>1</sub>/MgAl<sub>2</sub>O<sub>4</sub> catalyst.

| Edge      | Shell | N   | R/Å  | $\Delta\sigma^2/\text{Å}^2$ |
|-----------|-------|-----|------|-----------------------------|
| Ni K-edge | Ni-Ni | 3.6 | 2.46 | 0.00573                     |
| Ni K-edge | Ni-Ir | 4.8 | 2.65 | 0.00573                     |
| Ir-K-edge | Ir-Ir | 8.0 | 3.29 | 0.01291                     |
| Ir-K-edge | Ir-Ni | 4.6 | 2.63 | 0.01291                     |

236

237

238 Table S2. The comparison of the performance of dry reforming of methane with Ni-  
 239 based bimetallic catalysts.

| Catalyst                                                         | Gas composition                                               | GHSV<br>$L \cdot g^{-1} \cdot h^{-1}$ | Temp. | CH <sub>4</sub><br>Conv. | CO <sub>2</sub><br>Conv. | CH <sub>4</sub> Conv.<br>rate<br>$L \cdot g^{-1} \cdot h^{-1}$ | CO <sub>2</sub> Conv.<br>Rate<br>$L \cdot g^{-1} \cdot h^{-1}$ |
|------------------------------------------------------------------|---------------------------------------------------------------|---------------------------------------|-------|--------------------------|--------------------------|----------------------------------------------------------------|----------------------------------------------------------------|
| NiIr/MgAl <sub>2</sub> O <sub>4</sub><br>[this work]             | CH <sub>4</sub> /CO <sub>2</sub> =1/1                         | 40                                    | 650   | 62.5                     | 74.6                     | 12.5                                                           | 14.9                                                           |
| NiIr/MgAl <sub>2</sub> O <sub>4</sub><br>[this work]             | CH <sub>4</sub> /CO <sub>2</sub> =1/1                         | 40                                    | 700   | 77.4                     | 88.6                     | 15.5                                                           | 17.7                                                           |
| NiIr/MgAl <sub>2</sub> O <sub>4</sub><br>[this work]             | CH <sub>4</sub> /CO <sub>2</sub> =1/1                         | 40                                    | 750   | 84.7                     | 93.9                     | 16.9                                                           | 18.8                                                           |
| NiIr/MgAl <sub>2</sub> O <sub>4</sub><br>[this work]             | CH <sub>4</sub> /CO <sub>2</sub> =1/1                         | 40                                    | 800   | 90.4                     | 97.0                     | 18.1                                                           | 19.4                                                           |
| NiPd/SiO <sub>2</sub> -OA<br>[12]                                | CH <sub>4</sub> /CO <sub>2</sub> =1/1                         | 24                                    | 700   | 65                       | 76                       | 7.8                                                            | 9.1                                                            |
| PdNi/MgO [13]                                                    | CH <sub>4</sub> /CO <sub>2</sub> /He=1/1/12                   | 70                                    | 600   | 48                       | 47                       | 2.4                                                            | 2.5                                                            |
| PdNi/MgO [13]                                                    | CH <sub>4</sub> /CO <sub>2</sub> /He=1/1/12                   | 70                                    | 750   | 97                       | 96                       | 4.9                                                            | 4.8                                                            |
| PtNi/Al <sub>2</sub> O <sub>3</sub> [14]                         | CH <sub>4</sub> /CO <sub>2</sub> /He = 2/2/6                  | 30                                    | 700   | 69                       | 76                       | 4.1                                                            | 4.6                                                            |
| PtNi/Al <sub>2</sub> O <sub>3</sub> [15]                         | CH <sub>4</sub> /CO <sub>2</sub> =1/1                         | 7                                     | 750   | 79                       | 95                       | 2.77                                                           | 3.3                                                            |
| RhNiCo/<br>ZrO <sub>2</sub> /Al <sub>2</sub> O <sub>3</sub> [16] | CH <sub>4</sub> /CO <sub>2</sub> /N <sub>2</sub> =7/7/1       | 45                                    | 800   | 67.6                     | 71.8                     | 14.2                                                           | 15.1                                                           |
| CoNi/CeO <sub>2</sub> [17]                                       | CH <sub>4</sub> /CO <sub>2</sub> /N <sub>2</sub> =3/3/4       | 12                                    | 650   | 50                       | 59                       | 1.8                                                            | 2.1                                                            |
| NiCo/Al <sub>2</sub> O <sub>3</sub> [18]                         | CH <sub>4</sub> /CO <sub>2</sub> =1/1                         | 36                                    | 700   | 67                       | 71                       | 12.1                                                           | 12.8                                                           |
| NiCu/Mg(Al)O<br>[19]                                             | CH <sub>4</sub> /CO <sub>2</sub> /N <sub>2</sub> =1/1/2       | 60                                    | 600   | 52                       | 63                       | 7.8                                                            | 9.5                                                            |
| GdNi/Y <sub>2</sub> O <sub>3</sub> [20]                          | CH <sub>4</sub> /CO <sub>2</sub> /N <sub>2</sub> =17/17/<br>6 | 8                                     | 700   | 78                       | 73                       | 2.7                                                            | 2.5                                                            |

## 241 Supplementary References

242

243 1 Li W. *et al.* Stable platinum nanoparticles on specific MgAl<sub>2</sub>O<sub>4</sub> spinel facets at high  
244 temperatures in oxidizing atmospheres. *Nat. Commun.* **4**, 2481, doi: 10.1038/ncomms3481  
245 (2013).

246 2 Kresse, G. & Furthmüller, J. Efficiency of ab-initio total energy calculations for metals and  
247 semiconductors using a plane-wave basis set. *Comput. Mater. Sci.* **6**, 15-50, doi:10.1016/0927-  
248 0256(96)00008-0 (1996).

249 3 Kresse, G. & Furthmüller, J. Efficient iterative schemes for ab initio total-energy calculations  
250 using a plane-wave basis set. *Phys. Rev. B* **54**, 11169-11186, doi:10.1103/PhysRevB.54.11169  
251 (1996).

252 4 Kresse, G. & Hafner, J. Ab initio molecular dynamics for open-shell transition metals. *Phys Rev*  
253 *B* **48**, 13115-13118, doi:10.1103/PhysRevB.48.13115 (1993).

254 5 Kresse, G. & Hafner, J. Ab initio molecular-dynamics simulation of the liquid-metal-  
255 amorphous-semiconductor transition in germanium. *Phys. Rev. B* **49**, 14251-14269,  
256 doi:10.1103/PhysRevB.49.14251 (1994).

257 6 Perdew, J. P., Burke, K. & Ernzerhof, M. Generalized gradient approximation made simple.  
258 *Phys. Rev. Lett.* **77**, 3865-3868, doi:10.1103/PhysRevLett.77.3865 (1996).

259 7 Kresse, G. & Joubert, D. From ultrasoft pseudopotentials to the projector augmented-wave  
260 method. *Phys. Rev. B* **59**, 1758-1775, doi:10.1103/PhysRevB.59.1758 (1999).

261 8 Grimme, S., Ehrlich, S., & Goerigk, L. Effect of the damping function in dispersion corrected  
262 density functional theory. *J. Comput. Chem.* **32**, 1456-1465, doi:10.1002/jcc.21759 (2011).

263 9 Henkelman, G. & Jónsson, H. Improved tangent estimate in the nudged elastic band method for  
264 finding minimum energy paths and saddle points. *J. Chem. Phys.* **113**, 9978-9985,  
265 doi:10.1063/1.1323224 (2000).

266 10 Krukau, A. V. *et al.* Influence of the exchange screening parameter on the performance of  
267 screened hybrid functionals. *J. Chem. Phys.* **125**, 224106, doi:10.1063/1.2404663 (2006).

268 11 Henkelman, G. & Jónsson, H. A dimer method for finding saddle points on high dimensional  
269 potential surfaces using only first derivatives. *J. Chem. Phys.* **111**, 7010-7022,  
270 doi:10.1063/1.480097 (1999).

271 12 Pan, C., Guo, Z., Dai, H., Ren, R. & Chu, W. Anti-sintering mesoporous Ni-Pd bimetallic  
272 catalysts for hydrogen production via dry reforming of methane. *Int. J. Hydrog. Energy* **45**,  
273 16133-16143, doi:10.1016/j.ijhydene.2020.04.066 (2020).

274 13 Singha, R. K., Shukla, A., Sandupatla, A., Deo, G. & Bal, R. Synthesis and catalytic activity of  
275 a Pd doped Ni-MgO catalyst for dry reforming of methane. *J. Mater. Chem. A* **5**, 15688-15699,  
276 doi:10.1039/c7ta04452f (2017).

277 14 García-Diéguez, M., Pieta, I. S., Herrera, M. C., Larrubia, M. A. & Alemany, L. J.  
278 Nanostructured Pt- and Ni-based catalysts for CO<sub>2</sub>-reforming of methane. *J. Catal.* **270**, 136-  
279 145, doi:10.1016/j.jcat.2009.12.010 (2010).

280 15 de Miguel, S. R. *et al.* Influence of Pt addition to Ni catalysts on the catalytic performance for  
281 long term dry reforming of methane. *Appl. Catal. A-Gen.* **435-436**, 10-18,  
282 doi:10.1016/j.apcata.2012.05.030 (2012).

283 16 Al-Fatesh, A. *et al.* Rh promoted and ZrO<sub>2</sub>/Al<sub>2</sub>O<sub>3</sub> supported Ni/Co based catalysts: High activity

284 for CO<sub>2</sub> reforming, steam–CO<sub>2</sub> reforming and oxy–CO<sub>2</sub> reforming of CH<sub>4</sub>. *Int. J. Hydrog.*  
285 *Energy* **43**, 12069-12080, doi:10.1016/j.ijhydene.2018.04.152 (2018).

286 17 Turap, Y. *et al.* Co–Ni alloy supported on CeO<sub>2</sub> as a bimetallic catalyst for dry reforming of  
287 methane. *Int. J. Hydrog. Energy* **45**, 6538-6548, doi:10.1016/j.ijhydene.2019.12.223 (2020).

288 18 Siang, T. J. *et al.* Hydrogen production from CH<sub>4</sub> dry reforming over bimetallic Ni–Co/Al<sub>2</sub>O<sub>3</sub>  
289 catalyst. *J. Energy Inst.* **91**, 683-694, doi:10.1016/j.joei.2017.06.001 (2018).

290 19 Song, K. *et al.* Effect of alloy composition on catalytic performance and coke-resistance  
291 property of Ni-Cu/Mg(Al)O catalysts for dry reforming of methane. *Appl. Catal. B-Environ.*  
292 **239**, 324-333, doi:10.1016/j.apcatb.2018.08.023 (2018).

293 20 Al-Fatesh, A. S. Promotional effect of Gd over Ni/Y<sub>2</sub>O<sub>3</sub> catalyst used in dry reforming of CH<sub>4</sub>  
294 for H<sub>2</sub> production. *Int. J. Hydrog. Energy* **42**, 18805-18816, doi:10.1016/j.ijhydene.2017.06.165  
295 (2017).
